# Supplementary material
Source: PubMed Central journal article supplement (PMC9271601)
Supplement: NIHMS1801616-supplement-4.pdf [file NIHMS1801616-supplement-4.pdf]

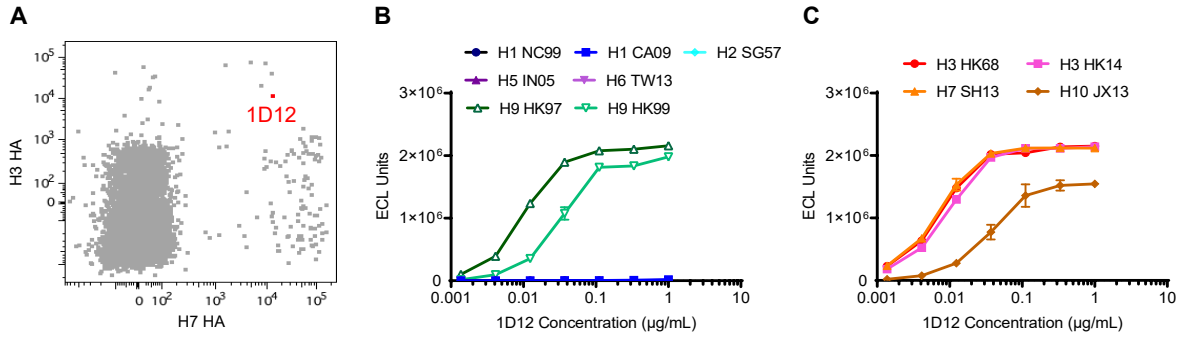

**Figure S1. Isolation and HA binding of 315-19-1D12 antibody, related to Figure 1**

(A) B cell sorting plot of the PBMCs collected from a human donor two weeks after the vaccine boost. In red is the cell from which the 315-19-1D12 genes were amplified and sequenced that showed binding to both H7 and H3 HAs. (B) Binding measurement of 1D12 antibody to Group 1 HA. (C) Binding measurement of 1D12 antibody to Group 2 HA. Error bars in (B) and (C) represent SD of the antibody tested in duplicate, representative of two independent experiments.

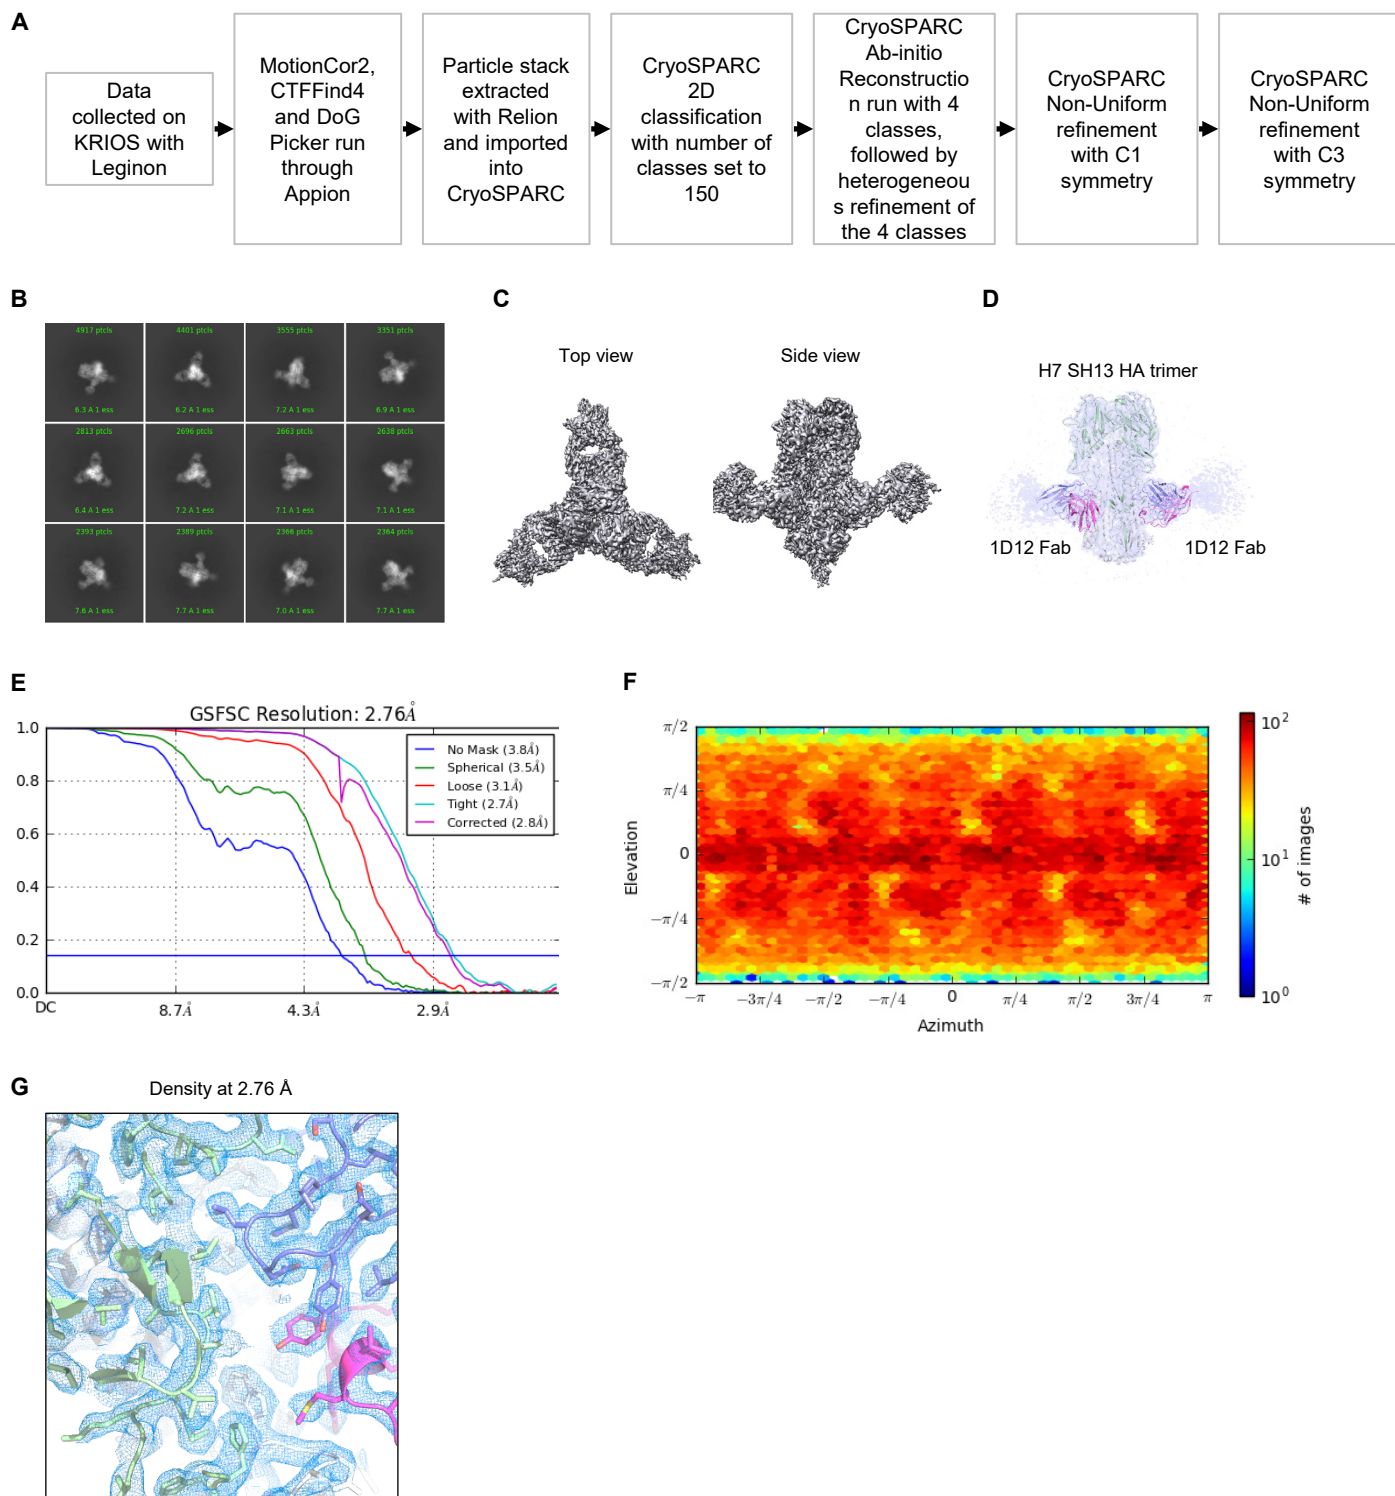

**Figure S2. EM supporting data and HA-Fab binding data, related to Figure 1**

(A) Workflow of data processing is shown. (B) Representative 2D class averages calculated from selected particles. (C) Three-D reconstruction of electron density map. (D) Superposition of refined coordinates with the cryo-EM reconstructed density map. (E) FSC curves of the 3D reconstructions with horizontal blue line indicating  $FSC_{0.143}$ . (F) The angular distribution plot is shown indicating no preferred orientation issues. (G) A section of representative electron density at 2.76 Å superimposed on the refined coordinates.

**A Heavy and light chain sequences of inferred germline and mature 1D12 (Kabat)**

```

<-----FR1-----><-----CDR1-----><-----FR2-----><-----CDR2-----><-----FR3-----><-----CDR3-----><-----FR4----->
iGL QVQLVQSGAEVKKPGASVKVCKASGYFTFTGYMHWVRQAPGQGLEWMGRINPNSGGTNYAQKFGQVRVIMTRDTSISTAYMELSRRLSDDTAVYVYCATKRGAVTAMVYVYVYGMVDVWGQGTITVTVSS
Heavy QVQLVQSGAEVKKPGASVKVCKASGYFTFTGYLHWVRQAPGQGLEWMGRINPDTGGTNYAQKFGQVRVSMTRDMSISTHYMELSRRLSDDTAVYVYCATKRGAVTAMVYVYVYGMVDVWGQGTITVTVSS

<-----FR1-----><-----CDR1-----><-----FR2-----><-----CDR2-----><-----FR3-----><-----CDR3-----><-----FR4----->
iGL DIVMTQSPFLSLPVTGPEPASISCRSSQLLHNSNGVYLDWYLQKPGQSPQLLIYLGNSRASGVPRDFRFGSGSGSDTFTLKI SRVEAEADVGVYCMQALQTPPGLTFGGGKVEIK
Light DIVMTQSPFLSLPVTGPEPASISCRSSHSLHLLNGVYLDWYLQKPGQSPQLLIYLGNSRASGVPRDFRFGSGSGSDTFTLKI SRVEAEADVGVYCMQALRTPPGLTFGGGKVDIK
    
```

**B**

| Antibody     | HV    | HD     | HJ  | HV identity (%) | CDR H3              | LV     | LJ  | LV identity (%) | CDR L3      |
|--------------|-------|--------|-----|-----------------|---------------------|--------|-----|-----------------|-------------|
| 315-019-1D12 | HV1-2 | HD2-21 | HJ6 | 96.6            | KRGAVTAMVYVYFYGMVDV | KV2-28 | KJ4 | 96.6            | MQALRTPPGLT |

**C Summary of germline and mature 1D12 binding  $K_D$**

|         | HA       | Germline-reverted | Mature  |
|---------|----------|-------------------|---------|
| Group 1 | H1 S106  | NB                | NB      |
|         | H1 CA09  | NB                | NB      |
|         | H2 CAN05 | NB                | NB      |
|         | H5 VN04  | NB                | NB      |
|         | H9 HK99  | NB                | 23.0 nM |
| Group 2 | H3 HK68  | NB                | 14.1 nM |
|         | H3 TX12  | NB                | 32.3 nM |
|         | H7 AN13  | NB                | 34.4 nM |

**Octet binding curves of germline-reverted 1D12**

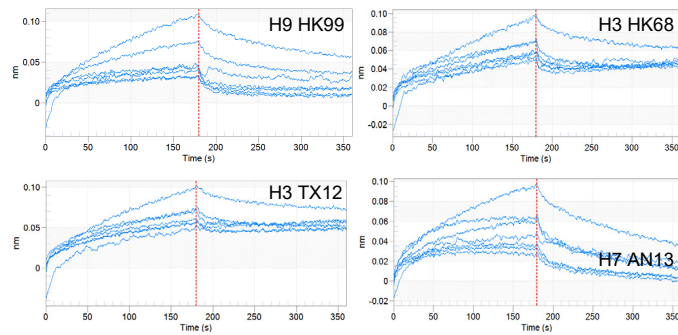

**D Classification of influenza antibodies from published papers and this paper**

| Antibody    | Specificity | Classes      | VH         | CDR H3                     | VL       | CDR L3         | Epitope, Structure and Sequence                 | 1D12 Class |
|-------------|-------------|--------------|------------|----------------------------|----------|----------------|-------------------------------------------------|------------|
| MEDI8852    | STEM        | VH6-1        | IGHV6-1    | CARSGHITVFGVNVDAFDMW       | IGKV1-39 | CQQSRTF        | MEDI8852 fits VH6-1 sequence signature          | -          |
| 315-55-1E08 | STEM        | -            | IGHV4-31   | CARVFFYYDTRGVFYGNAEGGFELW  | IGKV1-17 | CLQHNSYQNTF    | 1E08 uses different VH and VL pair              | -          |
| 315-55-1E11 | STEM        | -            | IGHV4-4    | CAAGRLDYSDDTGGYKPPPLDYW    | IGKV2-30 | CMQGTWHLTF     | 1E11 uses different VH and VL pair              | -          |
| 3E1         | STEM        | -            | IGHV4-4    | CAREEHITFGGQVIVRYW         | IGKV1-5  | CQQYNSYPWF     | 3E1 uses different VH and VL pair               | -          |
| Fl6v3       | STEM        | -            | IGHV3-30   | CAKDSQLRSLLYFENLSQGYFDYW   | IGKV4-1  | CQQHYRTPPTF    | Fl6v3 uses different VH and VL pair             | -          |
| Mab3.1      | STEM        | -            | IGHV3-30   | CARDLGGYFIRIGMDVW          | IGKV1-12 | CQQANSFPPTF    | Mab3.1 uses different VH and VL pair            | -          |
| 315-23-1C09 | STEM        | -            | IGHV3-30   | CAKDPAFIEMAFHW             | IGLV1-47 | CAAWDNLSDAHYVF | 1C09 uses different VH and VL pair              | -          |
| 315-53-1A07 | STEM        | -            | IGHV3-30   | CTRAIGTTDAFDIW             | IGLV1-51 | CCTWDRSLSAMVF  | 1A07 uses different VH and VL pair              | -          |
| CR9114      | STEM        | VH1-69       | IGHV1-69   | CARHGNYVYVSGMDVW           | IGLV1-44 | CAAWDLSLKGAVF  | CR9114 fits IGHV1-69 sequence signature         | -          |
| CR6261      | STEM        | VH1-69       | IGHV1-69   | CAKHMGYQVRETMVW            | IGLV1-51 | CATWDRRPTAYVVF | CR6261 fits IGHV1-69 sequence signature         | -          |
| 310-33-1F04 | HEAD        | -            | IGHV3-23   | CAKGPASTWQLDPSHHYNGMDVW    | IGKV1-17 | CLQHISYPLTF    | 1F04 binds HA head region                       | -          |
| 5J8         | HEAD        | -            | IGHV4-38-2 | CARHVRSGYPTAYYFDRW         | IGLV3-21 | CQVWDISTDQAVF  | 5J8 binds HA head region                        | -          |
| C05         | HEAD        | -            | IGHV3-23   | CHMSMQVVSAGWERADLVGW       | IGKV1-33 | CQQYDGLPPTF    | C05 binds HA head region                        | -          |
| F005-126    | HEAD        | -            | IGHV1-18   | CARVEGVRGVMPGHYYPMVW       | IGLV1-40 | CQSYDSSLGGVVF  | F005-126 binds HA head region                   | -          |
| F045-092    | HEAD        | -            | IGHV1-69   | CAGPSITESHYCLDCAARDYYGLDVM | IGLV1-44 | CASWDDSLNGVVF  | F045-092 binds HA head region                   | -          |
| 315-09-1B12 | STEM        | VH1-18 +QxxV | IGHV1-18   | CARGLLQGAVIDLSYHYALDFW     | IGKV3-20 | CQQYDTSFPRWTF  | 315-09-1B12 fits VH1-18+QxxV sequence signature | -          |
| CR8020      | STEM        | CR8020       | IGHV1-18   | CAREPPLFYSSWSLDNW          | IGKV3-20 | CQQYGTSPRTF    | CR8020 uses different VH and VL pair            | -          |
| CR8043      | STEM        | CR8043       | IGHV1-3    | CARGASWDARGWSGYW           | IGKV4-1  | CHQYYTAPWTF    | CR8043 uses different VH and VL pair            | -          |
| 315-53-1A09 | STEM        | -            | IGHV3-11   | CARTRLGDIVQAPGVIGYVYGMVW   | IGKV1-39 | CQQSHETPLTF    | 1A09 uses different VH and VL pair              | -          |
| CT149       | STEM        | VH1-18 +QxxV | IGHV1-18   | CARDKVQGRVEVSGGRHDYW       | IGKV3-20 | CQQFSVSPWTF    | CT149 fits VH1-18+QxxV sequence signature       | -          |

**Octet binding curves of mature 1D12**

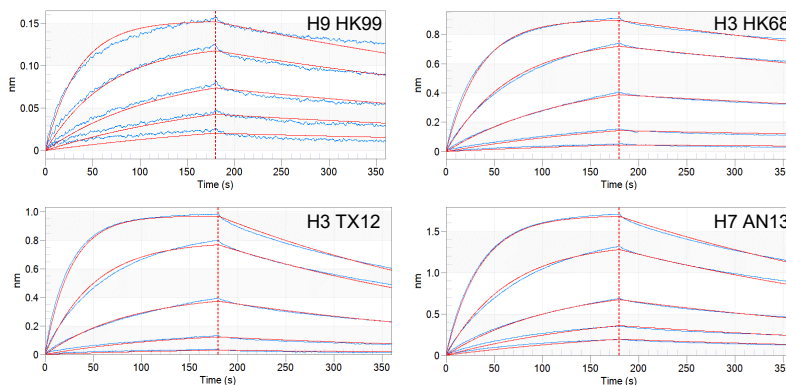

| Mature 1D12 Fab binding kinetics |               |                |
|----------------------------------|---------------|----------------|
| HA                               | $k_{on}(1/s)$ | $k_{off}(M/s)$ |
| H9 HK99                          | 6.77E+04      | 1.56E-03       |
| H3 HK68                          | 7.02E+04      | 9.89E-04       |
| H3 TX12                          | 8.55E+04      | 2.76E-03       |
| H7 AN13                          | 6.64E+04      | 2.28E-03       |

**Figure S3. Inferred germline-reverted 1D12 antibody does not bind influenza HA, related to Figure 3**

(A) Sequence alignments of germline and mature 1D12 heavy and light chains. (B) Summary of antibody 1D12 sequence characteristics. (C) Binding affinity and kinetics of 1D12 to various HAs measured by Octet. Hemagglutinin analyte concentrations used 2-fold dilutions starting at 100 nM and ending with 6.25 nM.

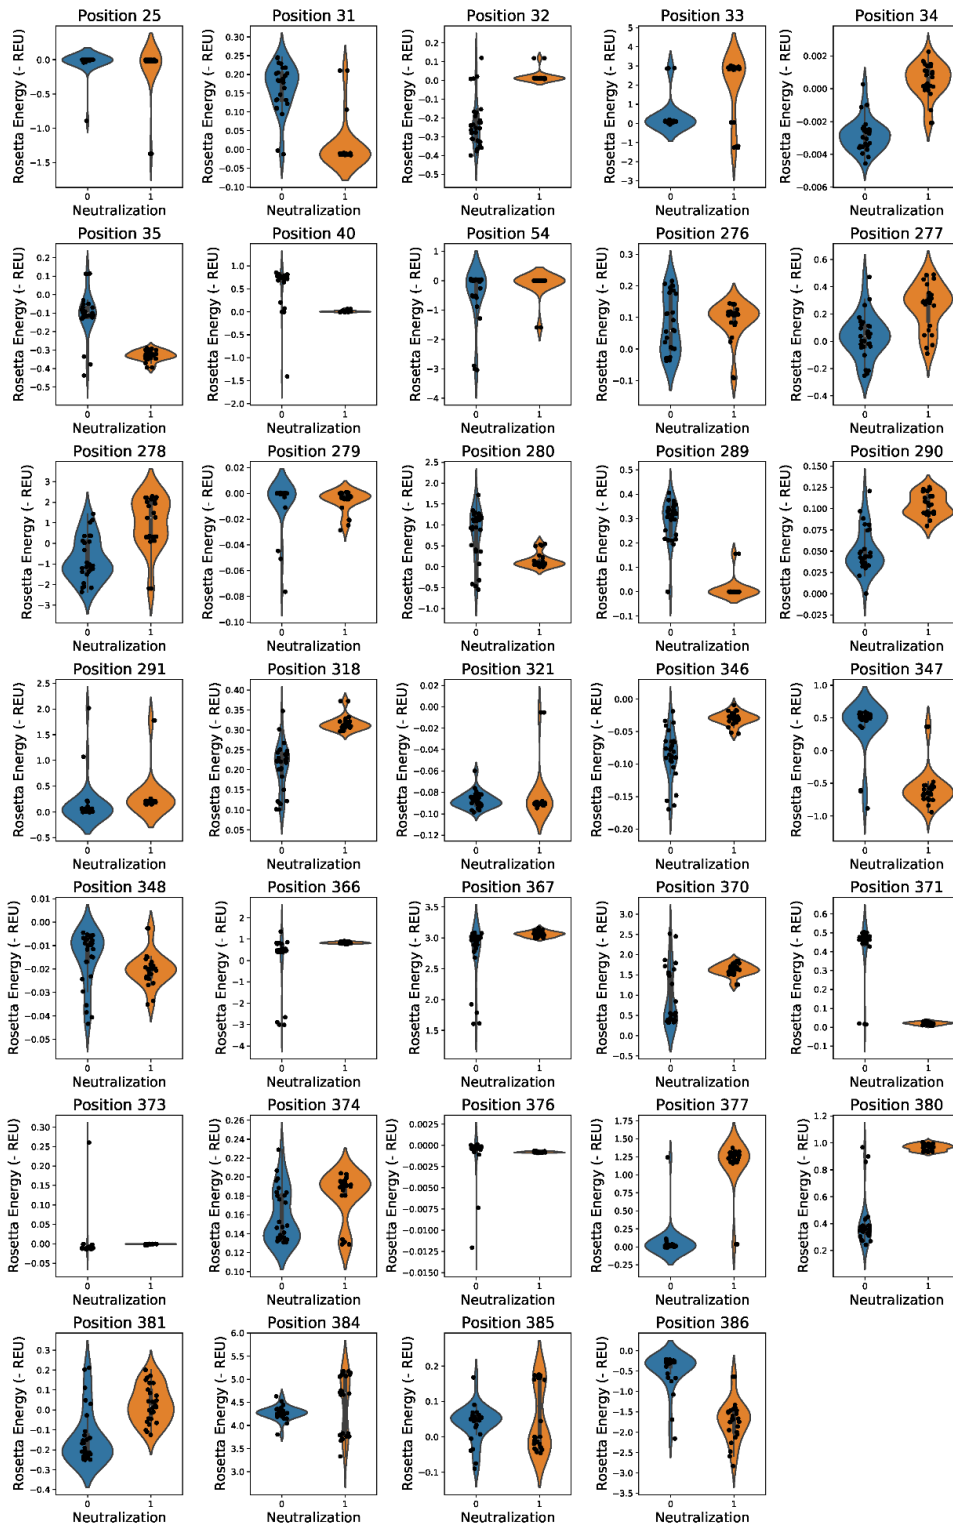

**Figure S4. Rosetta energies per position, related to Figure 5**

Rosetta energies for sensitive and resistant sets for specific subset of the extended epitope positions. Only 34 out of the 46 extended epitope positions are shown, with the remaining 10 positions having no detectable in-silico energy contributions.

**A** *In silico* classification ROC

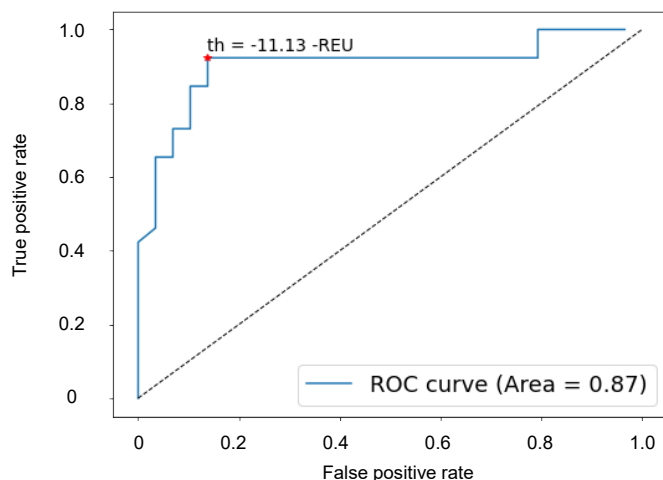

**B** Sensitive strains  $\Delta E$  for 4 key epitope positions

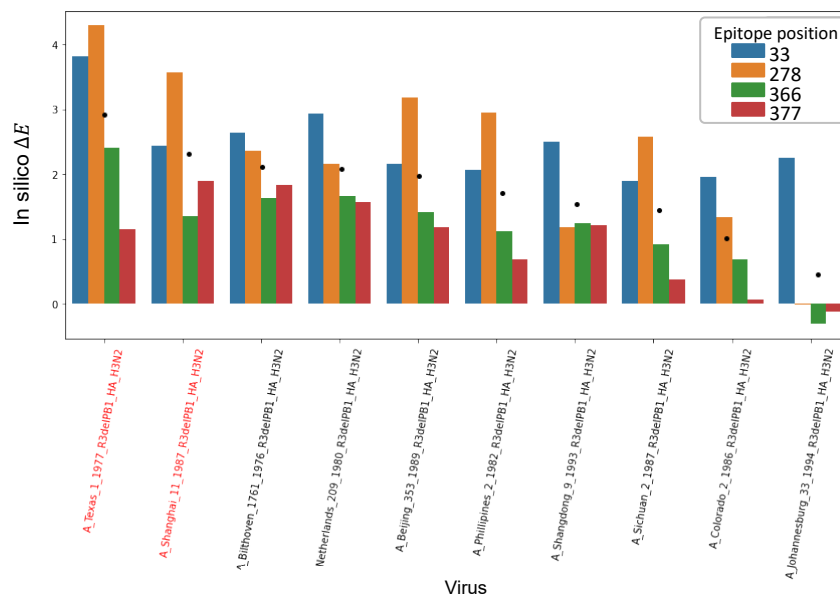

**C** *In silico*  $\Delta E$  correlated to experimental binding

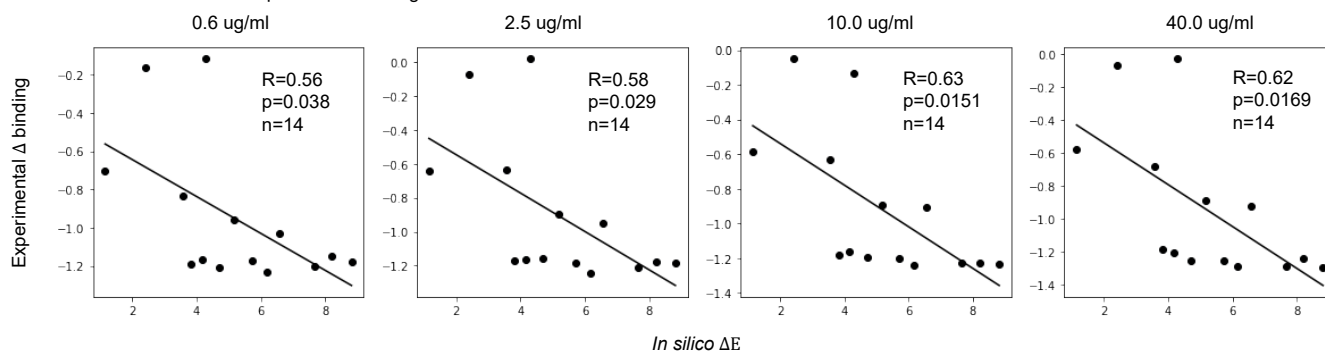

**Figure S5. Experimental assessment of *in silico* predictions shows high accuracy and correlates with experimental binding data, related to Figure 5**

(A) HA neutralization was predicted with *in silico* energies. The classification performance was assessed by the ROC AUC and achieves 89% accuracy at the best energy threshold. (B) Two sensitive strains containing the most frequent residues at the key epitope positions from the sensitive set were selected based on the highest average *in silico*  $\Delta E$  energy for further experimental validation. Black dots represent the average  $\Delta E$  across the 4 positions. (C) *In silico*  $\Delta E$  correlated to experimental  $\Delta$ Binding at multiple 1D12 antibody concentrations.

**Table S1. Cryo-EM data collection and refinement statistics, related to Figure 1**

|                                                 |  | H7 SH13 HA Trimer<br>in complex with 1D12 Fab |
|-------------------------------------------------|--|-----------------------------------------------|
| <b>EMDB ID</b>                                  |  | <b>21961</b>                                  |
| <b>PDB ID</b>                                   |  | <b>6WXL</b>                                   |
| Data Collection                                 |  |                                               |
| Microscope                                      |  | FEI Titan Krios                               |
| Voltage (kV)                                    |  | 300                                           |
| Electron dose (e <sup>-</sup> /Å <sup>2</sup> ) |  | 49.90                                         |
| Detector                                        |  | Gatan K3                                      |
| Pixel Size (Å)                                  |  | 1.083                                         |
| Defocus Range (µm)                              |  | -0.1 to -3.3                                  |
| Magnification                                   |  | 81000                                         |
| Images                                          |  | 1878                                          |
| Reconstruction                                  |  |                                               |
| Software                                        |  | cryoSparcV2.12                                |
| Particles                                       |  | 142,628                                       |
| Symmetry                                        |  | C3                                            |
| Box size (pix)                                  |  | 400                                           |
| Resolution Å (FSC <sub>0.143</sub> )            |  | 2.76                                          |
| Refinement (Phenix)                             |  |                                               |
| Protein residues                                |  | 2175                                          |
| CC (mask)                                       |  | 0.78                                          |
| CC (box)                                        |  | 0.64                                          |
| CC (peak)                                       |  | 0.58                                          |
| CC (volume)                                     |  | 0.77                                          |
| Chimera CC                                      |  | 0.89                                          |
| d FSC <sub>0.143</sub> Model Resolution (Å)     |  | 2.5                                           |
| EMRinger Score                                  |  | 3.72                                          |
| R.m.s. deviations                               |  |                                               |
| Bond lengths (Å)                                |  | 0.005                                         |
| Bond angles (°)                                 |  | 0.697                                         |
| Validation                                      |  |                                               |
| Molprobit score                                 |  | 1.28                                          |
| Clash score                                     |  | 2.9                                           |
| Rotamer outliers (%)                            |  | 0.16                                          |
| Ramachandran                                    |  |                                               |
| Favored regions (%)                             |  | 96.79                                         |
| Disallowed regions (%)                          |  | 0.0                                           |

**Table S2. Interactions between 1D12 Fab and influenza A virus HA, related to Figure 1**

The data were output from PISA (<https://www.ebi.ac.uk/pdbe/pisa>) analysis of the cryo-EM structure of the 1D12-SH13 HA complex. (Table continued on next page)

(A) Epitope and paratope areas

|                             | HA    | Light chain |
|-----------------------------|-------|-------------|
| Interface (Å <sup>2</sup> ) | 591.6 | 600.1       |
|                             | HA    | Heavy chain |
| Interface (Å <sup>2</sup> ) | 480.6 | 544.1       |

(B) Hydrogen bonds between 315-19-1D12 and SH13 HA

|    | 1D12 atom        | Bond distance [Å] | SH13 HA atom    |
|----|------------------|-------------------|-----------------|
| 1  | H:LYS 95[ NZ ]   | 3.31              | B:GLN 42[ OE1]  |
| 2  | H:TYR 100E[ OH ] | 3.12              | B:ASP 19[ O ]   |
| 3  | H:TYR 100H[ OH ] | 3.19              | B:THR 49[ OG1]  |
| 4  | H:TYR 100H[ OH ] | 2.78              | B:ASP 46[ OD1]  |
| 5  | H:TYR 100E[ O ]  | 3.04              | B:GLN 42[ NE2]  |
| 6  | L:ARG 24[ NH2]   | 2.89              | A:ASP 276A[ O ] |
| 7  | L:ARG 93[ NH2]   | 3.03              | A:ASN 291[ OD1] |
| 8  | L:SER 27A[ O ]   | 2.99              | A:ASN 291[ ND2] |
| 9  | L:LEU 27C[ O ]   | 2.75              | A:ASN 291[ ND2] |
| 10 | L:LEU 27E[ O ]   | 3.01              | A:THR 40[ OG1]  |
| 11 | L:HIS 27D[ NE2]  | 2.78              | B:ASN 53[ OD1]  |
| 12 | L:ARG 93[ NH2]   | 2.83              | B:ILE 56[ O ]   |
| 13 | L:ARG 93[ NE ]   | 3.05              | B:ILE 56[ O ]   |

**Table S2 (continued from prior page). Interactions between 1D12 Fab and influenza A virus HA, related to Figure 1**

H: hydrogen bond; ASA: accessible surface area, Å<sup>2</sup>; BSA: buried surface area, Å<sup>2</sup>; ΔiG: solvation energy effect, kcal/mol; ||||: buried area percentage, one bar per 10%. (Table continued on next page)

(C) HA Residues that interact with heavy chain

| HA atoms                                    | ASA    | BSA   | ΔiG   |
|---------------------------------------------|--------|-------|-------|
| HA1 A:HIS 18                                | 106.81 | 18.78 | 0.05  |
| [ CB ][ CG ][ CD2 ][ CE1 ]                  |        |       |       |
| [ NE2 ]                                     |        |       |       |
| A:THR 318                                   | 87.28  | 2.70  | -0.03 |
| [ O ]                                       |        |       |       |
| HA2 B:LEU 17                                | 29.50  | 0.86  | -0.01 |
| [ O ]                                       |        |       |       |
| B:ILE 18                                    | 159.65 | 23.12 | -0.18 |
| [ CA ][ C ][ O ]                            |        |       |       |
| B:ASP 19                                    | 99.80  | 60.07 | 0.25  |
| [ CA ][ C ][ O ] <sup>H</sup> [ CB ][ OD1 ] |        |       |       |
| B:GLY 20                                    | 13.29  | 8.45  | 0.02  |
| [ N ][ CA ][ C ][ O ]                       |        |       |       |
| B:TRP 21                                    | 116.72 | 27.42 | 0.13  |
| [ CD1 ][ NE1 ][ CZ2 ]                       |        |       |       |
| B:ASP 37                                    | 12.99  | 0.24  | -0.00 |
| [ O ]                                       |        |       |       |
| B:TYR 38                                    | 159.49 | 55.23 | 0.52  |
| [ CA ][ C ][ O ][ CB ][ CG ]                |        |       |       |
| [ CD1 ][ CD2 ][ CE1 ][ CE2 ]                |        |       |       |
| [ CZ ][ OH ]                                |        |       |       |
| B:LYS 39                                    | 174.57 | 52.48 | 0.26  |
| [ CA ][ O ][ CB ][ CG ][ CE ]               |        |       |       |
| [ NZ ]                                      |        |       |       |
| B:THR 41                                    | 14.89  | 14.89 | 0.24  |
| [ CB ][ CG2 ]                               |        |       |       |
| B:GLN 42                                    | 101.05 | 95.49 | -0.27 |
| [ N ][ CA ][ CB ][ CG ][ CD ]               |        |       |       |
| [ OE1 ] <sup>H</sup> [ NE2 ] <sup>H</sup>   |        |       |       |
| B:SER 43                                    | 42.27  | 1.61  | 0.01  |
| [ N ][ CA ][ CB ]                           |        |       |       |
| B:ILE 45                                    | 58.77  | 57.42 | 0.92  |
| [ CG1 ][ CG2 ][ CD1 ]                       |        |       |       |
| B:ASP 46                                    | 87.14  | 29.21 | -0.25 |
| [ CA ][ CG ][ OD1 ] <sup>H</sup> [ OD2 ]    |        |       |       |
| B:THR 49                                    | 63.70  | 34.97 | 0.25  |
| [ CB ][ OG1 ] <sup>H</sup> [ CG2 ]          |        |       |       |

(D) Heavy chain residues that interact with HA

| Heavy chain atoms                       | ASA    | BSA    | ΔiG   |
|-----------------------------------------|--------|--------|-------|
| HA1 H:MET 100B                          | 148.11 | 20.92  | 0.33  |
| [ CE ]                                  |        |        |       |
| H:TYR 100F                              | 164.94 | 2.45   | -0.03 |
| [ OH ]                                  |        |        |       |
| HA2 H:THR 28                            | 141.86 | 15.75  | -0.16 |
| [ C ][ O ][ OG1 ][ CG2 ]                |        |        |       |
| H:PHE 29                                | 125.38 | 79.29  | 1.18  |
| [ CA ][ O ][ CD1 ][ CE1 ]               |        |        |       |
| [ CE2 ][ CZ ]                           |        |        |       |
| H:GLY 31                                | 22.93  | 7.85   | -0.09 |
| [ O ]                                   |        |        |       |
| H:TYR 32                                | 48.66  | 14.22  | 0.13  |
| [ CD2 ][ CE2 ][ OH ]                    |        |        |       |
| H:LYS 95                                | 12.75  | 6.51   | -0.20 |
| [ CE ][ NZ ] <sup>H</sup>               |        |        |       |
| H:ALA 98                                | 113.26 | 5.53   | 0.09  |
| [ CA ]                                  |        |        |       |
| H:VAL 99                                | 63.45  | 7.15   | -0.08 |
| [ C ][ O ]                              |        |        |       |
| H:THR 100                               | 144.94 | 49.29  | 0.51  |
| [ CA ][ C ][ O ][ CB ]                  |        |        |       |
| H:ALA 100A                              | 38.34  | 2.28   | 0.03  |
| [ C ][ O ]                              |        |        |       |
| H:MET 100B                              | 148.59 | 81.36  | 1.61  |
| [ N ][ CA ][ CB ][ SD ]                 |        |        |       |
| [ CE ]                                  |        |        |       |
| H:TYR 100E                              | 146.62 | 133.42 | 0.69  |
| [ CA ][ C ][ O ] <sup>H</sup> [ CB ]    |        |        |       |
| [ CG ][ CD1 ][ CD2 ][ CE1 ]             |        |        |       |
| [ CE2 ][ CZ ][ OH ] <sup>H</sup>        |        |        |       |
| H:TYR 100F                              | 164.08 | 54.29  | 0.34  |
| [ CB ][ CD1 ][ CE1 ][ CE2 ]             |        |        |       |
| [ CZ ][ OH ]                            |        |        |       |
| H:TYR 100H                              | 133.32 | 63.86  | 0.06  |
| [ CE1 ][ CE2 ][ CZ ][ OH ] <sup>H</sup> |        |        |       |



**Table S2 (continued from prior page). Interactions between 1D12 Fab and influenza A virus HA, related to Figure 1**

H: hydrogen bond; ASA: accessible surface area, Å<sup>2</sup>; BSA: buried surface area, Å<sup>2</sup>; ΔiG: solvation energy effect, kcal/mol; ||||: buried area percentage, one bar per 10%.

(E) HA residues that interact with light chain

| HA atoms                     | ASA    | BSA    | ΔiG   |
|------------------------------|--------|--------|-------|
| HA1 A:THR 40                 | 60.24  | 32.77  | 0.26  |
| [CB][OG1] <sup>H</sup> [CG2] |        |        |       |
| A:GLU 41                     | 42.40  | 1.59   | -0.02 |
| [O]                          |        |        |       |
| A:THR 42                     | 20.10  | 5.60   | 0.08  |
| [CA][OG1][CG2]               |        |        |       |
| A:LYS 54                     | 110.02 | 10.22  | -0.31 |
| [CD][CE][NZ]                 |        |        |       |
| A:ASP 276A                   | 114.46 | 29.43  | -0.01 |
| [CA][C][O] <sup>H</sup>      |        |        |       |
| [CB][CG][OD2]                |        |        |       |
| A:CYS 277                    | 30.88  | 3.84   | 0.06  |
| [CA]                         |        |        |       |
| A:GLU 278                    | 129.23 | 59.23  | 0.00  |
| [N][O][CB][CG]               |        |        |       |
| [CD][OE1][OE2]               |        |        |       |
| A:ASP 280                    | 68.25  | 2.69   | 0.04  |
| [CB]                         |        |        |       |
| A:ILE 289                    | 82.77  | 31.70  | 0.48  |
| [O][CG2]                     |        |        |       |
| A:SER 290                    | 41.78  | 7.22   | 0.12  |
| [CA][C]                      |        |        |       |
| A:ASN 291                    | 157.68 | 110.42 | -0.82 |
| [N][CA][C][O]                |        |        |       |
| [CB][CG][OD1] <sup>H</sup>   |        |        |       |
| [ND2] <sup>H</sup>           |        |        |       |
| A:LEU 292                    | 53.07  | 16.12  | 0.26  |
| [CA][CD2]                    |        |        |       |
| A:PRO 293                    | 68.16  | 12.82  | 0.21  |
| [CG][CD]                     |        |        |       |
| A:LEU 316                    | 108.08 | 14.82  | 0.24  |
| [CD2]                        |        |        |       |
| A:THR 318                    | 87.28  | 18.06  | 0.29  |
| [CB][CG2]                    |        |        |       |
| HA2 B:THR 49                 | 63.75  | 28.94  | 0.45  |
| [O][CB][CG2]                 |        |        |       |
| B:LEU 52                     | 97.87  | 53.99  | 0.85  |
| [C][O][CB][CG]               |        |        |       |
| [CD1][CD2]                   |        |        |       |
| B:ASN 53                     | 86.58  | 26.44  | -0.37 |
| [CG][OD1] <sup>H</sup> [ND2] |        |        |       |
| B:LEU 55                     | 92.32  | 14.26  | 0.22  |
| [O][CB][CD2]                 |        |        |       |
| B:ILE 56                     | 137.78 | 97.68  | 1.04  |
| [C][O] <sup>H</sup> [CB]     |        |        |       |
| [CG1][CG2][CD1]              |        |        |       |
| B:GLU 57                     | 126.34 | 8.37   | 0.13  |
| [CA][CB]                     |        |        |       |
| B:LYS 58                     | 173.96 | 5.37   | 0.06  |
| [N][CB]                      |        |        |       |

(F) Light chain residues that interact with HA

| Light chain atoms               | ASA    | BSA    | ΔiG   |
|---------------------------------|--------|--------|-------|
| HA1 L:ARG 24                    | 152.45 | 55.68  | -0.81 |
| [CD][NE][CZ][NH1]               |        |        |       |
| [NH2] <sup>H</sup>              |        |        |       |
| L:SER 26                        | 60.84  | 43.82  | -0.36 |
| [CA][O][CB][OG]                 |        |        |       |
| L:HIS 27                        | 86.20  | 21.26  | 0.28  |
| [CA][CB][ND1][CE1]              |        |        |       |
| L:SER 27A                       | 58.16  | 43.32  | 0.44  |
| [N][O] <sup>H</sup> [CB][OG]    |        |        |       |
| L:LEU 27C                       | 86.28  | 18.95  | -0.22 |
| [O] <sup>H</sup>                |        |        |       |
| L:HIS 27D                       | 74.58  | 2.69   | 0.04  |
| [CA][C][O]                      |        |        |       |
| L:LEU 27E                       | 180.99 | 109.00 | 1.13  |
| [N][CA][C][O] <sup>H</sup> [CB] |        |        |       |
| [CG][CD1][CD2]                  |        |        |       |
| L:ASN 28                        | 84.53  | 16.21  | 0.26  |
| [CA][C][CB]                     |        |        |       |
| L:THR 69                        | 47.30  | 9.54   | 0.15  |
| [CG2]                           |        |        |       |
| L:LEU 92                        | 22.34  | 4.85   | 0.08  |
| [CD1][CD2]                      |        |        |       |
| L:ARG 93                        | 124.57 | 20.53  | -0.76 |
| [NH2] <sup>H</sup>              |        |        |       |
| HA2 L:LEU 27C                   | 85.59  | 1.59   | -0.02 |
| [O]                             |        |        |       |
| L:HIS 27D                       | 75.39  | 63.22  | -0.20 |
| [CA][C][CG][ND1]                |        |        |       |
| [CD2][CE1][NE2] <sup>H</sup>    |        |        |       |
| L:LEU 27E                       | 181.66 | 72.00  | 1.07  |
| [N][C][O][CB][CG]               |        |        |       |
| [CD1]                           |        |        |       |
| L:ASN 28                        | 84.78  | 35.68  | -0.03 |
| [N][CA][CB][ND2]                |        |        |       |
| L:TYR 32                        | 57.84  | 5.16   | -0.06 |
| [OH]                            |        |        |       |
| L:LEU 92                        | 22.50  | 11.09  | 0.03  |
| [O][CG][CD1][CD2]               |        |        |       |
| L:ARG 93                        | 124.20 | 58.58  | -0.86 |
| [CA][CG][CD][NE] <sup>H</sup>   |        |        |       |
| [CZ][NH2] <sup>H</sup>          |        |        |       |
| L:THR 94                        | 106.72 | 4.85   | 0.08  |
| [CG2]                           |        |        |       |

**Table S3. The HA residues that compose the 1D12 epitope, related to Figure 5**  
 Residues that differ from the H7N9 SH13 (reference sequence) are in gray shade. Glycans present at positions 33 and 280 in group 1 HA1 are highlighted in red.

| Group | Subtype     | Strain                     | HA1 |    |    |    |    |    |    |      |     |     |     |     |     |     |     | HA2 |     |     |    |    |    |    |    |    |    |    |    |    |    |    |    |    |    |    |    |    |    |    |    |
|-------|-------------|----------------------------|-----|----|----|----|----|----|----|------|-----|-----|-----|-----|-----|-----|-----|-----|-----|-----|----|----|----|----|----|----|----|----|----|----|----|----|----|----|----|----|----|----|----|----|----|
|       |             |                            | 31  | 32 | 33 | 40 | 41 | 42 | 54 | 276A | 277 | 278 | 280 | 289 | 290 | 291 | 292 | 293 | 316 | 318 | 17 | 18 | 19 | 20 | 21 | 37 | 38 | 39 | 40 | 41 | 42 | 43 | 45 | 46 | 49 | 52 | 53 | 54 | 55 | 56 | 57 |
|       | <b>H7N9</b> | <b>A/Shanghai/1/2013</b>   | E   | R  | G  | T  | E  | T  | K  | A    | C   | E   | D   | I   | S   | N   | L   | P   | L   | T   | L  | I  | D  | G  | W  | D  | Y  | K  | S  | T  | Q  | S  | I  | D  | T  | L  | N  | L  | I  | E  | K  |
|       | H7N9        | A/Netherlands/219/2003     | E   | R  | G  | T  | E  | T  | K  | A    | C   | E   | D   | I   | S   | N   | L   | P   | L   | T   | L  | I  | D  | G  | W  | D  | Y  | K  | S  | T  | Q  | S  | I  | D  | T  | L  | N  | L  | I  | E  | K  |
|       | H7N9        | A/Anhui/1/2013             | E   | R  | G  | T  | E  | T  | K  | A    | C   | E   | D   | I   | S   | N   | L   | P   | L   | T   | L  | I  | D  | G  | W  | D  | Y  | K  | S  | T  | Q  | S  | I  | D  | T  | L  | N  | L  | I  | E  | K  |
|       | H3N2        | A/Hong Kong/1/1968         | D   | D  | Q  | T  | E  | L  | N  | /    | C   | I   | E   | P   | N   | D   | K   | P   | L   | T   | M  | I  | D  | G  | W  | D  | L  | K  | S  | T  | Q  | A  | I  | D  | N  | L  | N  | V  | I  | E  | K  |
|       | H3N2        | A/Bangkok/1/1979           | N   | D  | Q  | T  | E  | L  | S  | /    | C   | S   | E   | P   | N   | D   | K   | P   | L   | T   | M  | I  | D  | G  | W  | D  | L  | K  | S  | T  | Q  | A  | I  | D  | N  | L  | N  | V  | I  | E  | K  |
|       | H3N2        | A/Philippines/2/1982       | N   | D  | Q  | T  | E  | L  | S  | /    | C   | S   | E   | P   | N   | D   | K   | P   | L   | T   | M  | I  | D  | G  | W  | D  | L  | K  | S  | T  | Q  | A  | I  | D  | N  | L  | N  | V  | I  | E  | K  |
|       | H3N2        | A/Beijing/353/1989         | N   | D  | Q  | T  | E  | L  | S  | /    | C   | S   | E   | P   | N   | D   | K   | P   | L   | T   | M  | I  | N  | G  | W  | D  | L  | K  | S  | T  | Q  | A  | I  | D  | N  | L  | N  | V  | I  | E  | K  |
|       | H3N2        | A/Moscow/10/1999           | N   | D  | Q  | T  | E  | L  | S  | /    | C   | N   | E   | P   | N   | D   | K   | P   | L   | T   | M  | I  | N  | G  | W  | D  | L  | K  | S  | T  | Q  | A  | I  | N  | N  | L  | N  | V  | I  | E  | K  |
| 2     | H3N2        | A/Wyoming/3/2003           | N   | D  | Q  | T  | E  | L  | S  | /    | C   | N   | E   | P   | N   | D   | K   | P   | L   | T   | M  | I  | N  | G  | W  | D  | L  | K  | S  | T  | Q  | A  | I  | N  | N  | L  | N  | L  | I  | G  | K  |
|       | H3N2        | A/Wisconsin/67/2005        | N   | D  | Q  | T  | E  | L  | S  | /    | C   | N   | E   | P   | N   | D   | K   | P   | L   | T   | M  | I  | N  | G  | W  | D  | L  | K  | S  | T  | Q  | A  | I  | N  | N  | L  | N  | L  | I  | G  | K  |
|       | H3N2        | A/Brisbane/10/2007         | N   | D  | Q  | T  | E  | L  | S  | /    | C   | N   | E   | P   | N   | D   | K   | P   | L   | T   | M  | I  | N  | G  | W  | D  | L  | K  | S  | T  | Q  | A  | I  | D  | N  | L  | N  | L  | I  | G  | K  |
|       | H3N2        | A/Perth/16/2009            | N   | D  | Q  | T  | E  | L  | S  | /    | C   | N   | E   | P   | N   | D   | K   | P   | L   | T   | M  | I  | N  | G  | W  | D  | L  | K  | S  | T  | Q  | A  | I  | D  | N  | L  | N  | L  | I  | G  | K  |
|       | H3N2        | A/Victoria/361/2011        | N   | D  | Q  | T  | E  | L  | S  | /    | C   | N   | E   | P   | N   | D   | K   | P   | L   | T   | M  | I  | N  | G  | W  | D  | L  | K  | S  | T  | Q  | A  | I  | D  | N  | L  | N  | L  | I  | G  | K  |
|       | H3N2        | A/Texas/06/2012            | N   | D  | Q  | T  | E  | L  | S  | /    | C   | N   | A   | P   | N   | D   | K   | P   | L   | T   | M  | I  | N  | G  | W  | D  | L  | K  | S  | T  | Q  | A  | I  | D  | N  | L  | N  | L  | I  | G  | K  |
|       | H3N2        | A/Texas/50/2012            | N   | D  | R  | T  | E  | L  | S  | /    | C   | K   | E   | P   | N   | D   | K   | P   | L   | T   | M  | I  | N  | G  | W  | D  | L  | K  | S  | T  | Q  | A  | I  | D  | N  | L  | N  | L  | I  | G  | K  |
|       | H3N2        | A/Switzerland/9715293/2013 | N   | D  | R  | T  | E  | L  | S  | /    | C   | K   | E   | P   | N   | D   | K   | P   | L   | T   | M  | I  | N  | G  | W  | D  | L  | K  | S  | T  | Q  | A  | I  | D  | N  | L  | N  | L  | I  | G  | K  |
|       | H3N2        | A/Alaska/29/2014           | N   | D  | R  | T  | E  | L  | S  | /    | C   | K   | E   | P   | N   | D   | K   | P   | L   | T   | M  | I  | N  | G  | W  | D  | L  | K  | S  | T  | Q  | A  | I  | D  | N  | L  | N  | L  | I  | G  | K  |
|       | H10N8       | A/Jiangxi/IPB13/2013       | N   | E  | Q  | T  | E  | T  | K  | N    | C   | E   | K   | N   | T   | R   | L   | P   | L   | T   | M  | V  | D  | G  | W  | D  | Y  | K  | S  | T  | Q  | A  | I  | D  | T  | L  | N  | L  | V  | E  | K  |
|       | H1N1        | A/South Carolina/1/1918    | E   | K  | @  | V  | N  | L  | K  | /    | C   | N   | K   | @   | S   | S   | L   | P   | M   | T   | M  | I  | D  | G  | W  | D  | Q  | K  | S  | T  | Q  | N  | I  | D  | T  | V  | N  | V  | I  | E  | K  |
|       | H1N1        | A/Puerto Rico/8/1934       | E   | K  | @  | V  | N  | L  | K  | /    | C   | N   | K   | @   | S   | S   | L   | P   | M   | T   | M  | I  | D  | G  | W  | D  | Q  | K  | S  | T  | Q  | N  | I  | N  | T  | V  | N  | V  | I  | E  | K  |
|       | H1N1        | A/New Jersey/1976          | E   | K  | @  | V  | N  | L  | G  | /    | C   | N   | K   | @   | T   | S   | L   | P   | M   | T   | M  | I  | D  | G  | W  | D  | Q  | R  | S  | T  | Q  | N  | I  | D  | T  | V  | N  | V  | I  | E  | K  |
|       | H1N1        | A/Singapore/6/1986         | E   | K  | @  | V  | N  | L  | K  | /    | C   | D   | K   | @   | S   | S   | L   | P   | M   | T   | M  | I  | D  | G  | W  | D  | Q  | K  | S  | T  | Q  | N  | I  | N  | T  | V  | N  | V  | I  | E  | K  |
|       | H1N1        | A/Beijing/262/1995         | E   | K  | @  | V  | N  | L  | K  | /    | C   | D   | K   | @   | S   | S   | L   | P   | M   | T   | M  | I  | D  | G  | W  | D  | Q  | K  | S  | T  | Q  | N  | I  | N  | T  | V  | N  | V  | I  | E  | K  |
|       | H1N1        | A/New Caledonia/20/1999    | E   | K  | @  | V  | N  | L  | K  | /    | C   | D   | K   | @   | S   | S   | L   | P   | M   | T   | M  | I  | D  | G  | W  | D  | Q  | K  | S  | T  | Q  | N  | I  | N  | T  | V  | N  | V  | I  | E  | K  |
|       | H1N1        | A/Solomon Island/3/2006    | E   | K  | @  | V  | N  | L  | K  | /    | C   | D   | K   | @   | S   | S   | L   | P   | M   | T   | M  | I  | D  | G  | W  | D  | Q  | K  | S  | T  | Q  | N  | I  | N  | T  | V  | N  | V  | I  | E  | K  |
|       | H1N1        | A/Brisbane/59/2007         | E   | K  | @  | V  | N  | L  | K  | /    | C   | D   | K   | @   | S   | S   | L   | P   | M   | T   | M  | I  | D  | G  | W  | D  | Q  | K  | S  | T  | Q  | N  | I  | N  | T  | V  | N  | V  | I  | E  | K  |
| 1     | H1N1        | A/California/04/2009       | E   | K  | @  | V  | N  | L  | K  | /    | C   | @   | T   | @   | T   | S   | L   | P   | M   | T   | M  | I  | D  | G  | W  | D  | L  | K  | S  | T  | Q  | N  | I  | D  | T  | V  | N  | V  | I  | E  | K  |
|       | H2N2        | A/Singapore/1/1957         | E   | R  | @  | K  | D  | I  | N  | /    | C   | E   | K   | @   | T   | T   | L   | P   | M   | T   | M  | I  | D  | G  | W  | D  | K  | E  | S  | T  | Q  | K  | F  | D  | T  | V  | N  | V  | I  | E  | K  |
|       | H2N2        | A/Canada/720/2005          | E   | R  | @  | K  | D  | I  | N  | /    | C   | E   | K   | @   | T   | T   | L   | P   | M   | T   | M  | I  | D  | G  | W  | D  | K  | E  | S  | T  | Q  | K  | F  | D  | T  | V  | N  | V  | I  | E  | K  |
|       | H5N1        | A/Hong Kong/483/1997       | E   | K  | @  | Q  | D  | I  | N  | /    | C   | N   | K   | @   | S   | S   | M   | P   | M   | T   | M  | I  | D  | G  | W  | D  | Q  | E  | S  | T  | Q  | K  | I  | D  | T  | V  | N  | I  | I  | N  | K  |
|       | H5N1        | A/Vietnam/1203/2004        | E   | K  | @  | Q  | D  | I  | D  | /    | C   | N   | K   | @   | S   | S   | M   | P   | M   | T   | M  | I  | D  | G  | W  | D  | K  | E  | S  | T  | Q  | K  | I  | D  | T  | V  | N  | I  | I  | D  | K  |
|       | H5N1        | A/Thailand/1(Kan-1)/2004   | E   | K  | @  | Q  | D  | I  | D  | /    | C   | N   | K   | @   | S   | S   | M   | P   | M   | T   | M  | I  | D  | G  | W  | D  | K  | E  | S  | T  | Q  | K  | I  | D  | T  | V  | N  | I  | I  | D  | K  |
|       | H5N1        | A/Indonesia/05/2005        | E   | K  | @  | Q  | D  | I  | D  | /    | C   | N   | K   | @   | S   | S   | M   | P   | M   | T   | M  | I  | D  | G  | W  | D  | K  | E  | S  | T  | Q  | K  | I  | D  | T  | V  | N  | I  | I  | D  | K  |
|       | H5N1        | A/Turkey/Turkey/1/2005     | E   | K  | @  | Q  | D  | I  | D  | /    | C   | N   | K   | @   | S   | S   | M   | P   | M   | T   | M  | I  | D  | G  | W  | D  | K  | E  | S  | T  | Q  | K  | I  | D  | T  | V  | N  | I  | I  | D  | K  |
|       | H5N1        | A/Anhui/1/2005             | E   | K  | @  | Q  | D  | I  | D  | /    | C   | N   | K   | @   | S   | S   | M   | P   | M   | T   | M  | I  | D  | G  | W  | D  | K  | E  | S  | T  | Q  | K  | I  | D  | T  | V  | N  | I  | I  | D  | K  |
|       | H5N1        | A/Egypt/0636-NAMRU3/2007   | E   | K  | @  | Q  | D  | I  | N  | /    | C   | N   | K   | @   | S   | S   | M   | P   | M   | T   | M  | I  | D  | G  | W  | D  | K  | E  | S  | T  | Q  | K  | I  | D  | T  | V  | N  | I  | I  | D  | K  |
|       | H9N2        | A/Hong Kong/1074/1999      | E   | T  | N  | K  | E  | L  | S  | /    | C   | V   | Q   | @   | S   | T   | L   | P   | L   | V   | L  | V  | A  | G  | W  | D  | R  | D  | S  | T  | Q  | K  | I  | D  | T  | V  | N  | I  | V  | D  | K  |
